# Supplementary material for: Catalytic properties of Ga-substituted ZSM-5 zeolite in propane aromatization
Source: Research Square preprint supplement (doi:10.21203/rs.3.rs-8027050/v1), 2025-11-05
Supplement: Supplementary file 1 [file 0976c85e2723a67d49804677.docx]

Supplementary material

1. Catalyst characterization

X-ray diffraction (XRD) patterns were recorded on a RIGAKU diffractometric using CuKα radiation. Nitrogen adsorption/desorption was recorded on a Micromeritics ASAP-2020V3.00H analyzer. X-ray photoelectron spectroscopy (XPS) were measured on an ESCALAB 250 spectrometer. The surface morphology and particle size analysis of the samples were obtained by a GeminiSEM 500 Field emission scanning electron microcopy (SEM). Infrared spectra of pyridine adsorption (Py-IR) and OH stretching regions of the IR spectra were analyzed on a Nicolet iS50 spectrometer. The carbon deposits from the as-used catalysts was determined using an PerkinElmer TGA 8000. Temperature programmed desorption of ammonia (NH3-TPD) was measured by a Micromeritics Chemisorb 2720 analyzer. Si, Ga and Al contents were quantitatively analyzed by inductively coupled plasma atomic emission spectrometer (ICP-AES) manufactured in Agilent, USA.

2. Catalyst evaluation

Using N2 as an internal standard for analyzing products, the products were analyzed on-line with a gas chromatograph (GC). The gaseous phase products monitored by online analysis using TDX-01 packed column equipped with a TCD detector and a PLOT-Q pillared column connected to an FID detector produced by Shimadzu. Aromatic hydrocarbons were analyzed with an FID detector on a DB-WAX column produced by Agilent. The propane conversion *xpropane* and product selectivity *S*i were calculated in the following equations.

100 (1)

where *C*i and *Cpropane* are the concentrations for species *i* and propane, respectively.

1. Figure(s)

Fig. S1. NH3-TPD profiles of the synthesized samples.
